# Supplementary material for: Membrane transporters control cerebrospinal fluid formation independently of conventional osmosis to modulate intracranial pressure
Source: PubMed Central journal article supplement (PMC9422132; doi:10.1186/s12987-022-00358-4), 2022-08-29
Supplement: 12987_2022_358_MOESM2_ESM.pdf [file 12987_2022_358_MOESM2_ESM.pdf]

## Supplementary Data

Fluid velocity and solute concentration distribution along the longitudinal axis of a functional unit (FU) were determined through the set of coupled steady-state differential Equations S1 and S2 originally proposed by Diamond & Bossert [29] with the boundary conditions specified in Equations S3 to S5:

$$\frac{4\varphi(x)}{\rho \cdot d} + D \frac{d^2 C}{dx^2} - C(x) \frac{dv}{dx} - v(x) \frac{dC}{dx} = 0, \quad (\text{S1})$$

$$\frac{dv}{dx} = \frac{4L_p}{d} [C(x) - C_0] \quad (\text{S2})$$

$$C(l) = C_0 \quad (\text{S3})$$

$$v(0) = 0 \quad (\text{S4})$$

$$\left. \frac{dC}{dx} \right|_{x=0} = 0 \quad (\text{S5})$$

Here,  $\varphi$  is the local solute flux,  $\rho$  is the cerebrospinal fluid (CSF) density,  $d$  is the FU diameter, and  $x$  is the location along the longitudinal axis of the FU, starting from 0 at the surface of the luminal cell membrane and ending at  $l$ , the length of a microvillus.  $D$  is the diffusion coefficient,  $C$  is the solute concentration,  $v$  is the fluid velocity,  $L_p$  is the permeability of the luminal epithelial membrane, and  $C_0$  is the bulk solute concentration in the ventricular CSF. Solute flux through the base of the FU is accounted for by a correspondingly increased flux from the side of the FU within the first  $d/(2 \cdot l)$  of the functional unit length.

The diameter,  $d$ , of a functional unit (FU) is obtained by calculating the equivalent hydraulic diameter of the volume spanned by four neighboring microvilli, namely

$$d = \frac{4A_{CS}}{P_{CS}} = \frac{p^2 - \pi r^2}{p + \left(\frac{\pi}{2} - 2\right)r} \quad (\text{S6})$$

Here,  $A_{CS}$  and  $P_{CS}$  represent the FU cross-sectional area and perimeter, respectively. The pitch,  $p$ , is the separation distance of adjacent microvilli, and  $r$  is the radius of a microvillus. The pitch and number of functional units,  $N$ , are determined as

$$p = \sqrt{\frac{1}{n}} \quad (S7)$$

$$N = n \cdot A_{app} \quad (S8)$$

where  $n$  is the number of microvilli per unit area,  $A_{app}$  is the apparent luminal surface membrane area, i.e., without accounting for the surface extension by microvilli. The folding factor,  $FF$ , is defined as the ratio of the actual to the apparent luminal membrane surface area with

$$FF = A_{act}/A_{meas} \quad (S9)$$

$$A_{act} = N(p^2 + 2\pi rl) \quad (S10)$$

The rate of solute removal from the ventricular space by bulk flow of CSF,  $\Phi$ , is calculated as

$$\Phi = V_p \cdot \rho \cdot C_0 \quad (S11)$$

where  $V_p$  is the measured CSF secretion rate,  $\rho$  is CSF density, and  $C_0$  is the bulk solute concentration. This solute removal rate is assumed to be equal to the solute transfer rate into all FUs. The solute flux,  $\varphi$ , through the sides and bottoms of all FUs is then

$$\varphi = \frac{\Phi}{N\left(\frac{\pi d^2}{4} + \pi dl\right)} \quad (S12)$$

The CSF production rate predicted by the model,  $Q$ , is obtained as

$$Q = N \cdot q \quad (\text{S13})$$

$$q = \frac{\pi d^2}{4} v(l) \quad (\text{S14})$$

where  $q$  is the calculated rate of water release from one FU and  $v(l)$  is the flow velocity at the end of the FU as provided by Equations S1 to S5. Parameter values used in the model are provided in Table S1.

**Table S1-** Parameter values employed in the osmotic water transfer model

| Model parameter (unit)                                                                                       | Symbol           | Value                |                     | Source     |
|--------------------------------------------------------------------------------------------------------------|------------------|----------------------|---------------------|------------|
|                                                                                                              |                  | Derived              | Measured            |            |
| Measured CSF secretion rate ( $\mu\text{l}/\text{min}$ )                                                     | $V_p$            |                      | 6.8                 | This study |
| Microvillus length ( $\mu\text{m}$ )                                                                         | $l$              |                      | 1.71                | This study |
| Microvillus radius ( $\mu\text{m}$ )                                                                         | $r$              |                      | 0.059               | This study |
| Number of microvilli per unit area ( $1/\mu\text{m}^2$ )                                                     | $n$              |                      | 18                  | This study |
| Choroid plexus apparent area ( $\text{cm}^2$ )                                                               | $A_{\text{app}}$ |                      | 4.6                 | This study |
| Diffusion coefficient ( $\text{cm}^2/\text{s}$ )                                                             | $D$              |                      | $1.5 \cdot 10^{-5}$ | [122]      |
| Luminal membrane permeability for $A_{\text{act}}$ ( $\text{cm} \cdot \text{s}^{-1} \cdot \text{Osm}^{-1}$ ) | $L_p$            |                      | $1.4 \cdot 10^{-5}$ | This study |
| Bulk solute concentration in CSF (Osm)                                                                       | $C_0$            |                      | 0.307               | This study |
| Density of CSF ( $\text{g}/\text{ml}$ )                                                                      | $\rho$           |                      | 1.00                | [51]       |
| Diameter of functional unit, FU ( $\mu\text{m}$ )                                                            | $d$              | 0.212                |                     | Eq. S6     |
| Microvilli separation distance, pitch ( $\mu\text{m}$ )                                                      | $p$              | 0.236                |                     | Eq. S7     |
| Number of functional units (-)                                                                               | $N$              | $8.28 \cdot 10^9$    |                     | Eq. S8     |
| Folding factor (-)                                                                                           | $FF$             | 12.37                |                     | Eq. S9     |
| Choroid plexus actual area ( $\text{cm}^2$ )                                                                 | $A_{\text{act}}$ | 56.91                |                     | Eq. S10    |
| Solute transfer rate ( $\text{mmol}/\text{s}$ )                                                              | $\Phi$           | $3.48 \cdot 10^{-5}$ |                     | Eq. S11    |
| Solute flux ( $\text{mmol} \cdot \text{s}^{-1} \cdot \text{cm}^{-2}$ )                                       | $\phi$           | $3.57 \cdot 10^{-7}$ |                     | Eq. S12    |
